# Supplementary material for: Using alkaline-earth metal ions to tune structural variations of 1,3,5-benzenetricarboxylate coordination polymers
Source: Royal Society of Chemistry journal article supplement (doi:10.1039/c2dt31536j), 2012-10-12
Supplement: c2dt31536j.pdf [file c2dt31536j.pdf]

## Supporting information

### Using alkaline-earth metal ions to tuned structural variations of 1, 3, 5-benzenetricarboxylate coordination polymers

Xin Zhang, Yuan-Yuan Huang, Qi-Pu Lin, Jian Zhang and Yuan-Gen Yao\*

*Key Laboratory of Coal to Ethylene Glycol and Its Related Technology, Fujian*

*Institute of Research on the Structure of Matter, Chinese Academy of Sciences,*

*Fuzhou, Fujian 350002, China*

**\* To whom correspondence should be addressed. E-mail: yyg@fjirsm.ac.cn**

**Table S1** Selected bond lengths (Å) and angles (°) for **1**.

|                      |            |                      |            |
|----------------------|------------|----------------------|------------|
| Cd(1)-O(12)#1        | 2.260(3)   | Cd(1)-O(4)#2         | 2.261(3)   |
| Cd(1)-O(4W)          | 2.270(3)   | Cd(1)-O(8)           | 2.311(3)   |
| Cd(1)-O(1)           | 2.339(3)   | Cd(2)-O(10)#3        | 2.241(3)   |
| Cd(2)-O(2)#4         | 2.243(3)   | Cd(2)-O(11)          | 2.316(3)   |
| Cd(2)-O(3)#5         | 2.317(3)   | Cd(2)-O(5)           | 2.361(3)   |
| Cd(2)-O(6)           | 2.478(3)   | Mg(1)-O(9)           | 2.012(3)   |
| Mg(1)-O(2W)          | 2.042(3)   | Mg(1)-O(1W)          | 2.066(3)   |
| Mg(1)-O(7)#3         | 2.108(3)   | Mg(1)-O(6)#3         | 2.111(3)   |
| Mg(1)-O(3W)          | 2.113(3)   | O(12)#1-Cd(1)-O(4)#2 | 140.83(11) |
| O(12)#1-Cd(1)-O(4W)  | 85.74(12)  | O(4)#2-Cd(1)-O(4W)   | 91.43(11)  |
| O(12)#1-Cd(1)-O(8)   | 82.64(10)  | O(4)#2-Cd(1)-O(8)    | 136.53(10) |
| O(4W)-Cd(1)-O(8)     | 91.88(11)  | O(12)#1-Cd(1)-O(1)   | 108.16(11) |
| O(4)#2-Cd(1)-O(1)    | 83.22(10)  | O(4W)-Cd(1)-O(1)     | 163.60(11) |
| O(8)-Cd(1)-O(1)      | 81.62(10)  | O(10)#3-Cd(2)-O(2)#4 | 135.05(10) |
| O(10)#3-Cd(2)-O(11)  | 84.76(10)  | O(2)#4-Cd(2)-O(11)   | 97.55(11)  |
| O(10)#3-Cd(2)-O(3)#5 | 83.21(10)  | O(2)#4-Cd(2)-O(3)#5  | 84.25(11)  |
| O(11)-Cd(2)-O(3)#5   | 164.53(10) | O(10)#3-Cd(2)-O(5)   | 144.44(10) |
| O(2)#4-Cd(2)-O(5)    | 80.50(10)  | O(11)-Cd(2)-O(5)     | 92.10(11)  |
| O(3)#5-Cd(2)-O(5)    | 103.34(11) | O(10)#3-Cd(2)-O(6)   | 91.49(9)   |
| O(2)#4-Cd(2)-O(6)    | 132.83(10) | O(11)-Cd(2)-O(6)     | 93.29(10)  |
| O(3)#5-Cd(2)-O(6)    | 96.70(10)  | O(5)-Cd(2)-O(6)      | 53.25(9)   |
| O(9)-Mg(1)-O(2W)     | 173.64(14) | O(9)-Mg(1)-O(1W)     | 89.80(13)  |
| O(2W)-Mg(1)-O(1W)    | 85.83(13)  | O(9)-Mg(1)-O(7)#3    | 95.43(12)  |

|                    |            |                     |            |
|--------------------|------------|---------------------|------------|
| O(2W)-Mg(1)-O(7)#3 | 89.40(12)  | O(1W)-Mg(1)-O(7)#3  | 92.64(12)  |
| O(9)-Mg(1)-O(6)#3  | 92.17(12)  | O(2W)-Mg(1)-O(6)#3  | 92.05(12)  |
| O(1W)-Mg(1)-O(6)#3 | 177.32(13) | O(7)#3-Mg(1)-O(6)#3 | 88.97(13)  |
| O(9)-Mg(1)-O(3W)   | 87.64(13)  | O(2W)-Mg(1)-O(3W)   | 87.71(13)  |
| O(1W)-Mg(1)-O(3W)  | 89.70(14)  | O(7)#3-Mg(1)-O(3W)  | 176.14(13) |
| O(6)#3-Mg(1)-O(3W) | 88.57(13)  |                     |            |

Symmetry codes: (#1)  $x, -y + 3/2, z - 1/2$ ; (#2)  $-x - 1, y - 1/2, -z - 1/2$ ; (#3)  $-x, -y + 1, -z$ ; (#4)  $x, -y + 3/2, z + 1/2$ ; (#5)  $-x - 1, -y + 1, -z$ .

**Table S2** Selected bond lengths (Å) and angles (°) for **2**.

|                      |            |                      |            |
|----------------------|------------|----------------------|------------|
| Cd(1)-O(11)#1        | 2.162(5)   | Cd(1)-O(8)#2         | 2.226(5)   |
| Cd(1)-O(9)           | 2.266(5)   | Cd(1)-O(1)#3         | 2.357(5)   |
| Cd(1)-O(10)          | 2.411(5)   | Cd(2)-O(4)           | 2.211(5)   |
| Cd(2)-O(7)           | 2.235(5)   | Cd(2)-O(1)#4         | 2.398(5)   |
| Cd(2)-O(5)#3         | 2.408(5)   | Cd(2)-O(6)#3         | 2.427(5)   |
| Cd(2)-O(2)#4         | 2.475(6)   | Ca(1)-O(3W)          | 2.319(6)   |
| Ca(1)-O(4W)          | 2.369(5)   | Ca(1)-O(12)          | 2.384(5)   |
| Ca(1)-O(1W)          | 2.393(5)   | Ca(1)-O(3)#5         | 2.419(5)   |
| Ca(1)-O(10)#6        | 2.442(5)   | Ca(1)-O(2W)          | 2.470(6)   |
| O(11)#1-Cd(1)-O(8)#2 | 101.20(19) | O(11)#1-Cd(1)-O(9)   | 165.4(2)   |
| O(8)#2-Cd(1)-O(9)    | 82.1(2)    | O(11)#1-Cd(1)-O(1)#3 | 92.55(19)  |
| O(8)#2-Cd(1)-O(1)#3  | 88.91(19)  | O(9)-Cd(1)-O(1)#3    | 101.78(18) |
| O(11)#1-Cd(1)-O(10)  | 116.27(19) | O(8)#2-Cd(1)-O(10)   | 136.47(19) |
| O(9)-Cd(1)-O(10)     | 56.18(17)  | O(1)#3-Cd(1)-O(10)   | 109.64(16) |
| O(4)-Cd(2)-O(7)      | 121.48(19) | O(4)-Cd(2)-O(1)#4    | 98.35(18)  |
| O(7)-Cd(2)-O(1)#4    | 128.69(19) | O(4)-Cd(2)-O(5)#3    | 148.3(2)   |
| O(7)-Cd(2)-O(5)#3    | 80.71(18)  | O(1)#4-Cd(2)-O(5)#3  | 80.13(18)  |
| O(4)-Cd(2)-O(6)#3    | 99.84(18)  | O(7)-Cd(2)-O(6)#3    | 92.48(18)  |
| O(1)#4-Cd(2)-O(6)#3  | 112.55(17) | O(5)#3-Cd(2)-O(6)#3  | 53.58(18)  |
| O(4)-Cd(2)-O(2)#4    | 93.76(18)  | O(7)-Cd(2)-O(2)#4    | 89.77(18)  |
| O(1)#4-Cd(2)-O(2)#4  | 53.99(16)  | O(5)#3-Cd(2)-O(2)#4  | 109.82(18) |
| O(6)#3-Cd(2)-O(2)#4  | 162.46(16) | O(3W)-Ca(1)-O(4W)    | 118.4(2)   |
| O(3W)-Ca(1)-O(12)    | 161.1(2)   | O(4W)-Ca(1)-O(12)    | 78.6(2)    |
| O(3W)-Ca(1)-O(1W)    | 86.0(2)    | O(4W)-Ca(1)-O(1W)    | 137.1(2)   |
| O(12)-Ca(1)-O(1W)    | 75.31(18)  | O(3W)-Ca(1)-O(3)#5   | 78.9(2)    |
| O(4W)-Ca(1)-O(3)#5   | 69.9(2)    | O(12)-Ca(1)-O(3)#5   | 116.80(18) |
| O(1W)-Ca(1)-O(3)#5   | 152.90(19) | O(3W)-Ca(1)-O(10)#6  | 91.7(2)    |
| O(4W)-Ca(1)-O(10)#6  | 131.7(2)   | O(12)-Ca(1)-O(10)#6  | 81.16(17)  |
| O(1W)-Ca(1)-O(10)#6  | 76.78(18)  | O(3)#5-Ca(1)-O(10)#6 | 81.21(17)  |
| O(3W)-Ca(1)-O(2W)    | 80.9(2)    | O(4W)-Ca(1)-O(2W)    | 75.0(2)    |
| O(12)-Ca(1)-O(2W)    | 96.91(19)  | O(1W)-Ca(1)-O(2W)    | 75.0(2)    |
| O(3)#5-Ca(1)-O(2W)   | 123.82(19) | O(10)#6-Ca(1)-O(2W)  | 151.2(2)   |

Symmetry codes: (#1)  $-x - 2, -y, z + 1/2$ ; (#2)  $-x - 2, -y + 1, z + 1/2$ ; (#3)  $x, y - 1, z$ ; (#4)  $-x - 3/2, y - 1/2, z - 1/2$ ; (#5)  $-x - 2, -y + 1, z - 1/2$ ; (#6)  $-x - 2, -y, z - 1/2$ ; (#7)  $x, y + 1, z$ ; (#8)  $-x - 3/2, y$

+ 1/2,  $z + 1/2$ .

**Table S3** Selected bond lengths (Å) and angles (°) for **3**.

|                      |           |                      |           |
|----------------------|-----------|----------------------|-----------|
| Cd(1)-O(9)           | 2.256(9)  | Cd(1)-O(12)#1        | 2.264(9)  |
| Cd(1)-O(8)#2         | 2.316(9)  | Cd(1)-O(3)#3         | 2.363(8)  |
| Cd(1)-O(4)#2         | 2.409(8)  | Cd(1)-O(7)#2         | 2.449(10) |
| Cd(1)-O(10)          | 2.507(9)  | Cd(2)-O(6)#4         | 2.199(9)  |
| Cd(2)-O(11)          | 2.224(8)  | Cd(2)-O(2)           | 2.317(9)  |
| Cd(2)-O(4)#5         | 2.362(9)  | Cd(2)-O(1)           | 2.478(8)  |
| Cd(2)-O(3)#5         | 2.549(10) | Sr(1)-O(10)          | 2.457(11) |
| Sr(1)-O(2W)          | 2.495(10) | Sr(1)-O(1W)          | 2.525(10) |
| Sr(1)-O(5)#2         | 2.541(9)  | Sr(1)-O(5W)          | 2.57(3)   |
| Sr(1)-O(7)#2         | 2.584(9)  | Sr(1)-O(4W)          | 2.66(2)   |
| Sr(1)-O(3W)          | 2.689(10) | O(9)-Cd(1)-O(12)#1   | 99.3(3)   |
| O(9)-Cd(1)-O(8)#2    | 178.0(3)  | O(12)#1-Cd(1)-O(8)#2 | 81.2(3)   |
| O(9)-Cd(1)-O(3)#3    | 92.5(3)   | O(12)#1-Cd(1)-O(3)#3 | 91.1(4)   |
| O(8)#2-Cd(1)-O(3)#3  | 89.4(3)   | O(9)-Cd(1)-O(4)#2    | 83.3(3)   |
| O(12)#1-Cd(1)-O(4)#2 | 90.3(3)   | O(8)#2-Cd(1)-O(4)#2  | 94.8(3)   |
| O(3)#3-Cd(1)-O(4)#2  | 175.7(3)  | O(9)-Cd(1)-O(7)#2    | 124.1(3)  |
| O(12)#1-Cd(1)-O(7)#2 | 136.6(3)  | O(8)#2-Cd(1)-O(7)#2  | 55.4(3)   |
| O(3)#3-Cd(1)-O(7)#2  | 89.8(3)   | O(4)#2-Cd(1)-O(7)#2  | 91.9(3)   |
| O(9)-Cd(1)-O(10)     | 54.2(3)   | O(12)#1-Cd(1)-O(10)  | 152.9(4)  |
| O(8)#2-Cd(1)-O(10)   | 125.6(4)  | O(3)#3-Cd(1)-O(10)   | 85.3(4)   |
| O(4)#2-Cd(1)-O(10)   | 91.6(4)   | O(7)#2-Cd(1)-O(10)   | 70.4(3)   |
| O(6)#4-Cd(2)-O(11)   | 113.6(3)  | O(6)#4-Cd(2)-O(2)    | 101.3(3)  |
| O(11)-Cd(2)-O(2)     | 93.4(3)   | O(6)#4-Cd(2)-O(4)#5  | 101.5(3)  |
| O(11)-Cd(2)-O(4)#5   | 122.2(3)  | O(2)-Cd(2)-O(4)#5    | 123.6(3)  |
| O(6)#4-Cd(2)-O(1)    | 151.0(3)  | O(11)-Cd(2)-O(1)     | 86.3(3)   |
| O(2)-Cd(2)-O(1)      | 54.7(3)   | O(4)#5-Cd(2)-O(1)    | 83.2(3)   |
| O(6)#4-Cd(2)-O(3)#5  | 92.7(3)   | O(11)-Cd(2)-O(3)#5   | 80.7(3)   |
| O(2)-Cd(2)-O(3)#5    | 165.9(3)  | O(4)#5-Cd(2)-O(3)#5  | 52.2(3)   |
| O(1)-Cd(2)-O(3)#5    | 111.9(3)  | O(10)-Sr(1)-O(2W)    | 131.7(4)  |
| O(10)-Sr(1)-O(1W)    | 126.8(3)  | O(2W)-Sr(1)-O(1W)    | 84.9(3)   |
| O(10)-Sr(1)-O(5)#2   | 143.1(3)  | O(2W)-Sr(1)-O(5)#2   | 76.6(3)   |
| O(1W)-Sr(1)-O(5)#2   | 70.0(3)   | O(10)-Sr(1)-O(5W)    | 67.7(9)   |
| O(2W)-Sr(1)-O(5W)    | 66.0(9)   | O(1W)-Sr(1)-O(5W)    | 114.1(9)  |
| O(5)#2-Sr(1)-O(5W)   | 141.3(9)  | O(10)-Sr(1)-O(7)#2   | 69.0(3)   |
| O(2W)-Sr(1)-O(7)#2   | 93.3(3)   | O(1W)-Sr(1)-O(7)#2   | 158.9(3)  |
| O(5)#2-Sr(1)-O(7)#2  | 89.1(3)   | O(5W)-Sr(1)-O(7)#2   | 83.9(9)   |
| O(10)-Sr(1)-O(4W)    | 86.9(5)   | O(2W)-Sr(1)-O(4W)    | 74.1(5)   |
| O(1W)-Sr(1)-O(4W)    | 65.4(6)   | O(5)#2-Sr(1)-O(4W)   | 128.0(5)  |
| O(5W)-Sr(1)-O(4W)    | 50.6(9)   | O(7)#2-Sr(1)-O(4W)   | 134.2(6)  |
| O(10)-Sr(1)-O(3W)    | 71.0(4)   | O(2W)-Sr(1)-O(3W)    | 156.4(3)  |
| O(1W)-Sr(1)-O(3W)    | 73.9(3)   | O(5)#2-Sr(1)-O(3W)   | 86.4(3)   |

|                   |          |                    |          |
|-------------------|----------|--------------------|----------|
| O(5W)-Sr(1)-O(3W) | 132.3(9) | O(7)#2-Sr(1)-O(3W) | 102.8(3) |
| O(4W)-Sr(1)-O(3W) | 105.2(5) |                    |          |

Symmetry codes: (#1)  $x, y - 1, z$ ; (#2)  $-x + 1, -y + 1, z - 1/2$ ; (#3)  $-x + 1/2, y - 1/2, z - 1/2$ ; (#4)  $x, y + 1, z$ ; (#5)  $-x + 1/2, y + 1/2, z - 1/2$ .

**Table S4** Selected bond lengths (Å) and angles (°) for **4**.

|                        |           |                        |           |
|------------------------|-----------|------------------------|-----------|
| Cd(1)-O(2)             | 2.226(10) | Cd(1)-O(3)#1           | 2.327(10) |
| Cd(1)-O(6)#2           | 2.338(12) | Cd(1)-O(5)#2           | 2.377(11) |
| Cd(1)-O(4)#3           | 2.385(11) | Cd(1)-O(3)#3           | 2.389(10) |
| Ba(1)-O(1)#1           | 2.691(11) | Ba(1)-O(1)             | 2.691(11) |
| Ba(1)-O(1)#4           | 2.691(11) | Ba(1)-O(1W)#4          | 2.873(13) |
| Ba(1)-O(1W)            | 2.873(13) | Ba(1)-O(1W)#1          | 2.873(13) |
| Ba(2)-O(3W)            | 1.98(3)   | Ba(2)-O(3W)#9          | 2.23(4)   |
| Ba(2)-O(3W)#8          | 2.84(3)   | Ba(2)-O(6)             | 2.931(15) |
| Ba(2)-O(3W)#7          | 2.96(2)   | Ba(2)-O(3W)#6          | 3.03(3)   |
| Ba(2)-O(3W)#10         | 3.14(3)   | O(2)-Cd(1)-O(3)#1      | 81.2(4)   |
| O(2)-Cd(1)-O(6)#2      | 172.6(4)  | O(3)#1-Cd(1)-O(6)#2    | 91.4(3)   |
| O(2)-Cd(1)-O(5)#2      | 126.4(4)  | O(3)#1-Cd(1)-O(5)#2    | 104.9(4)  |
| O(6)#2-Cd(1)-O(5)#2    | 55.7(4)   | O(2)-Cd(1)-O(4)#3      | 97.7(4)   |
| O(3)#1-Cd(1)-O(4)#3    | 85.3(4)   | O(6)#2-Cd(1)-O(4)#3    | 81.5(4)   |
| O(5)#2-Cd(1)-O(4)#3    | 135.6(4)  | O(2)-Cd(1)-O(3)#3      | 90.0(3)   |
| O(3)#1-Cd(1)-O(3)#3    | 136.2(3)  | O(6)#2-Cd(1)-O(3)#3    | 95.4(4)   |
| O(5)#2-Cd(1)-O(3)#3    | 114.5(3)  | O(4)#3-Cd(1)-O(3)#3    | 53.3(4)   |
| O(1)#1-Ba(1)-O(1)      | 104.1(3)  | O(1)#1-Ba(1)-O(1)#4    | 104.1(3)  |
| O(1)-Ba(1)-O(1)#4      | 104.1(3)  | O(1)#1-Ba(1)-O(1W)#4   | 117.6(3)  |
| O(1)-Ba(1)-O(1W)#4     | 76.2(3)   | O(1)#4-Ba(1)-O(1W)#4   | 137.0(3)  |
| O(1)#1-Ba(1)-O(1W)     | 76.2(3)   | O(1)-Ba(1)-O(1W)       | 137.0(3)  |
| O(1)#4-Ba(1)-O(1W)     | 117.6(3)  | O(1W)#4-Ba(1)-O(1W)    | 66.7(4)   |
| O(1)#1-Ba(1)-O(1W)#1   | 137.0(3)  | O(1)-Ba(1)-O(1W)#1     | 117.6(3)  |
| O(1)#4-Ba(1)-O(1W)#1   | 76.2(3)   | O(1W)#4-Ba(1)-O(1W)#1  | 66.7(4)   |
| O(1W)-Ba(1)-O(1W)#1    | 66.7(4)   | O(3W)-Ba(2)-O(3W)#9    | 129.8(9)  |
| O(3W)-Ba(2)-O(3W)#8    | 75.4(12)  | O(3W)#9-Ba(2)-O(3W)#8  | 146.5(9)  |
| O(3W)-Ba(2)-O(3W)#7    | 72.4(11)  | O(3W)#9-Ba(2)-O(3W)#7  | 138.8(8)  |
| O(3W)#8-Ba(2)-O(3W)#7  | 62.7(7)   | O(3W)-Ba(2)-O(3W)#6    | 152.7(10) |
| O(3W)#9-Ba(2)-O(3W)#6  | 68.3(9)   | O(3W)#8-Ba(2)-O(3W)#6  | 80.9(4)   |
| O(3W)#7-Ba(2)-O(3W)#6  | 108.4(6)  | O(3W)-Ba(2)-O(3W)#10   | 142.7(8)  |
| O(3W)#9-Ba(2)-O(3W)#10 | 66.1(8)   | O(3W)#8-Ba(2)-O(3W)#10 | 109.0(6)  |
| O(3W)#7-Ba(2)-O(3W)#10 | 77.2(4)   | O(3W)#6-Ba(2)-O(3W)#10 | 58.7(6)   |

Symmetry codes: (#1)  $-x + y, -x + 2, z$ ; (#2)  $y - 1, x, z + 1/2$ ; (#3)  $x - y + 2, -y + 3, z + 1/2$ ; (#4)  $-y + 2, x - y + 2, z$ ; (#5)  $x - y + 1, -y + 3, z + 1/2$ ; (#6)  $-x + 2, -x + y + 1, z + 1/2$ ; (#7)  $-y + 3, x - y + 3, z$ ; (#8)  $-x + y, -x + 3, z$ ; (#9)  $x - y + 2, -y + 4, z + 1/2$ ; (#10)  $y - 1, x + 1, z + 1/2$ .

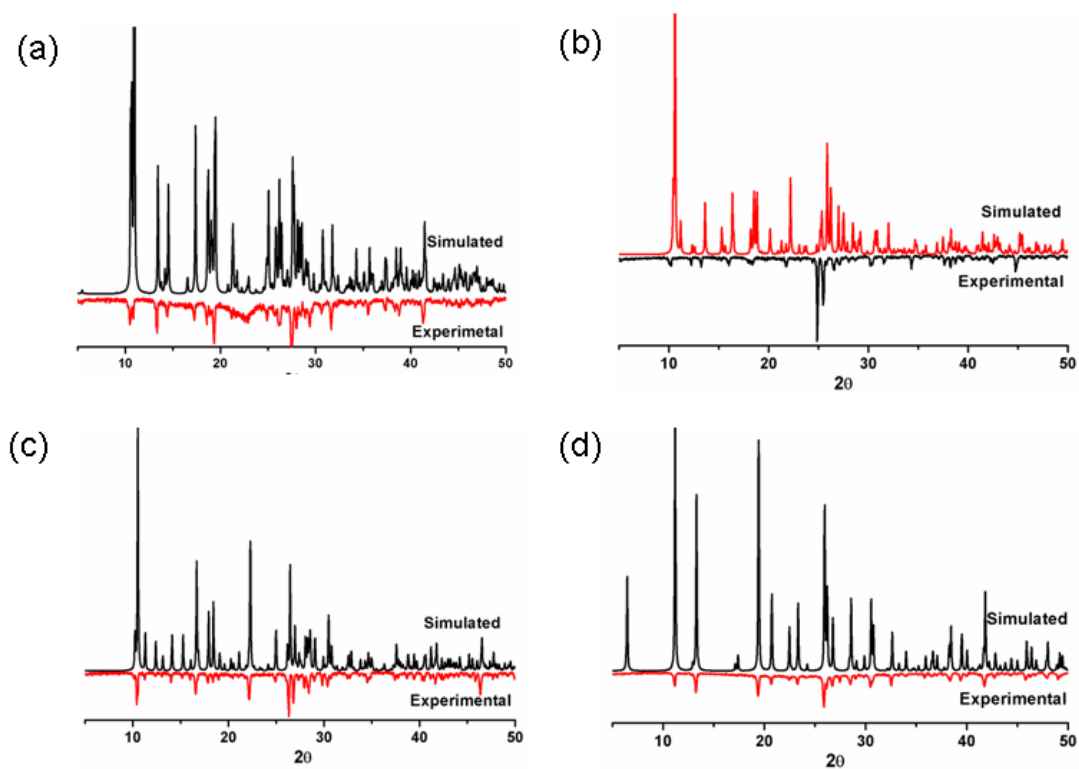

**Fig. S1.** The simulated and experimental XRD patterns of each compound (a) for **1**, (b) for **2**, and (c) for **3**, (d) for **4**.
